# Supplementary material for: Processing code-multiplexed Coulter signals via deep convolutional neural networks
Source: Royal Society of Chemistry journal article supplement (doi:10.1039/c9lc00597h), 2019-01-01
Supplement: c9lc00597h1.pdf [file c9lc00597h1.pdf]

(a) First convolutional layer: 32 kernels, 1 channel.

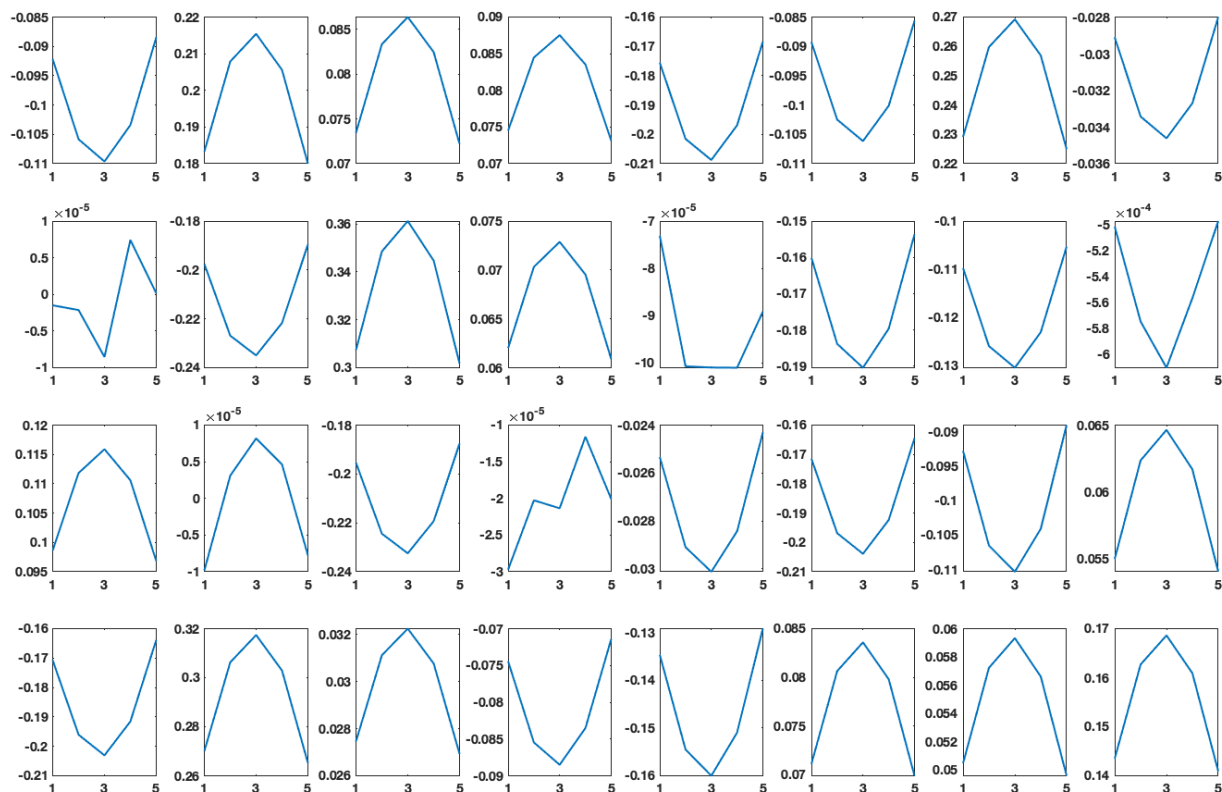

(b) Second convolutional layer: 32 kernels, 32 channels.

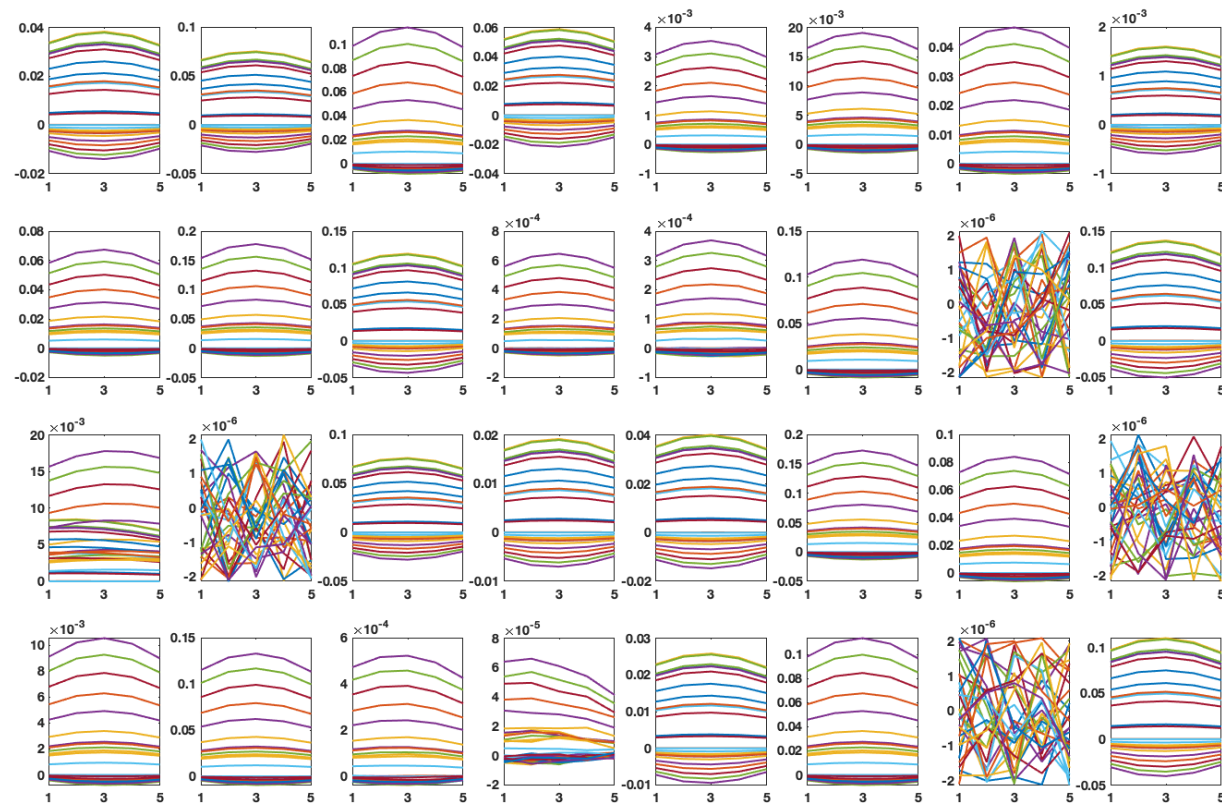

(c) Third convolutional layer: 64 kernels, 32 channels.

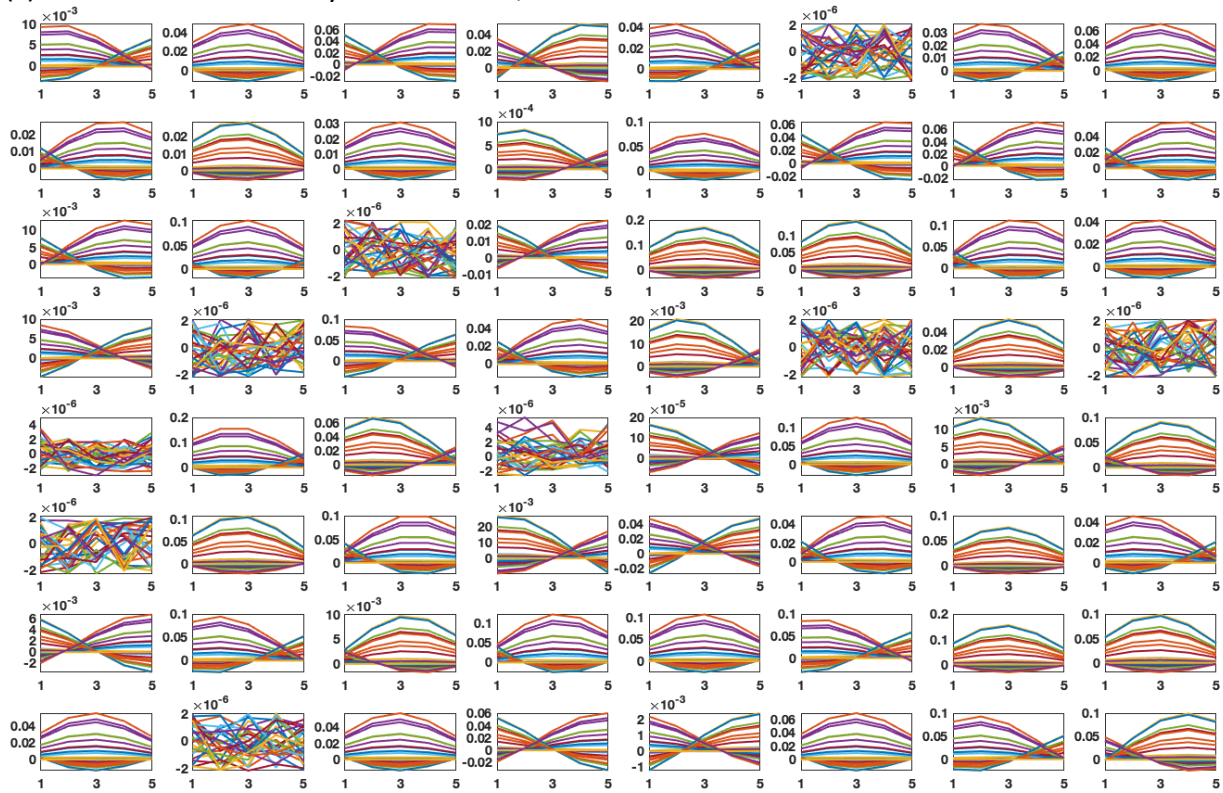

(d) Forth convolutional layer: 64 kernels, 64 channels.

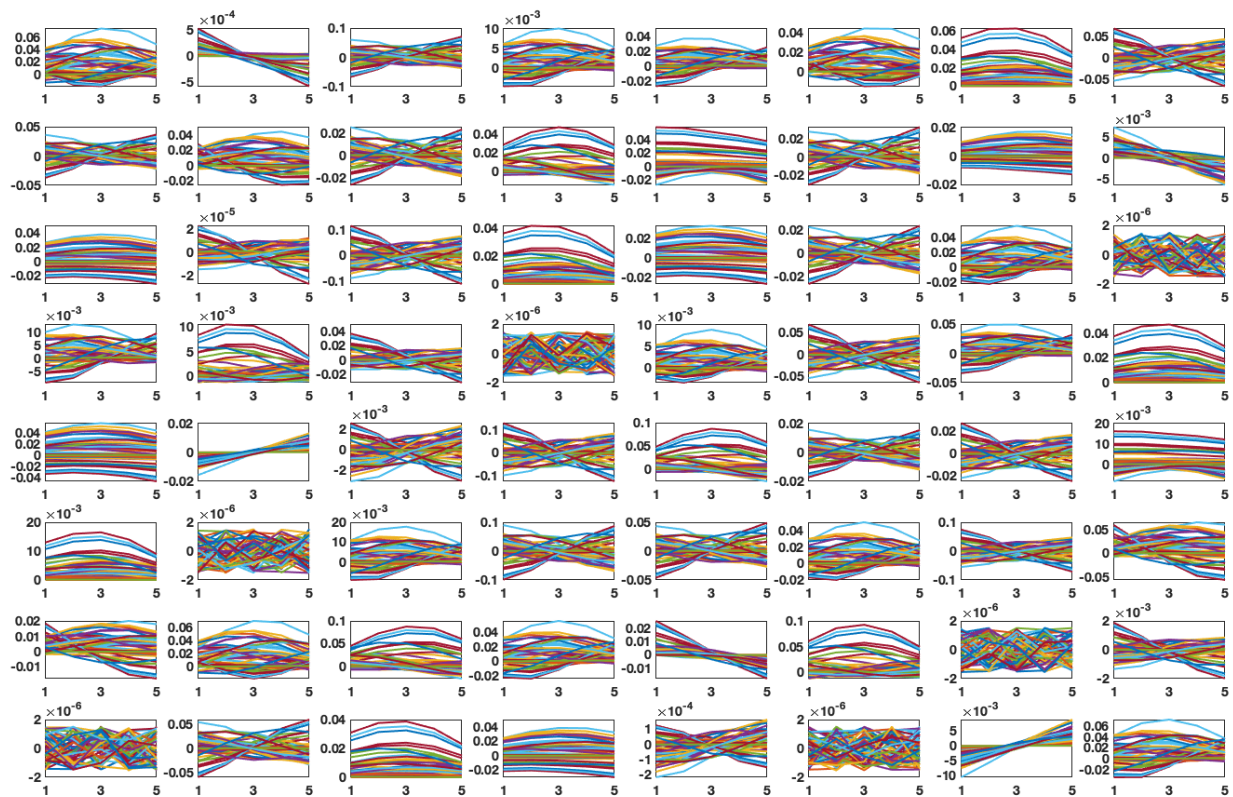

Supplementary Figure 1: Kernel visualization. (X-axis: Number of weights. Y-axis: Value of weights.)
